# Psychiatric Services

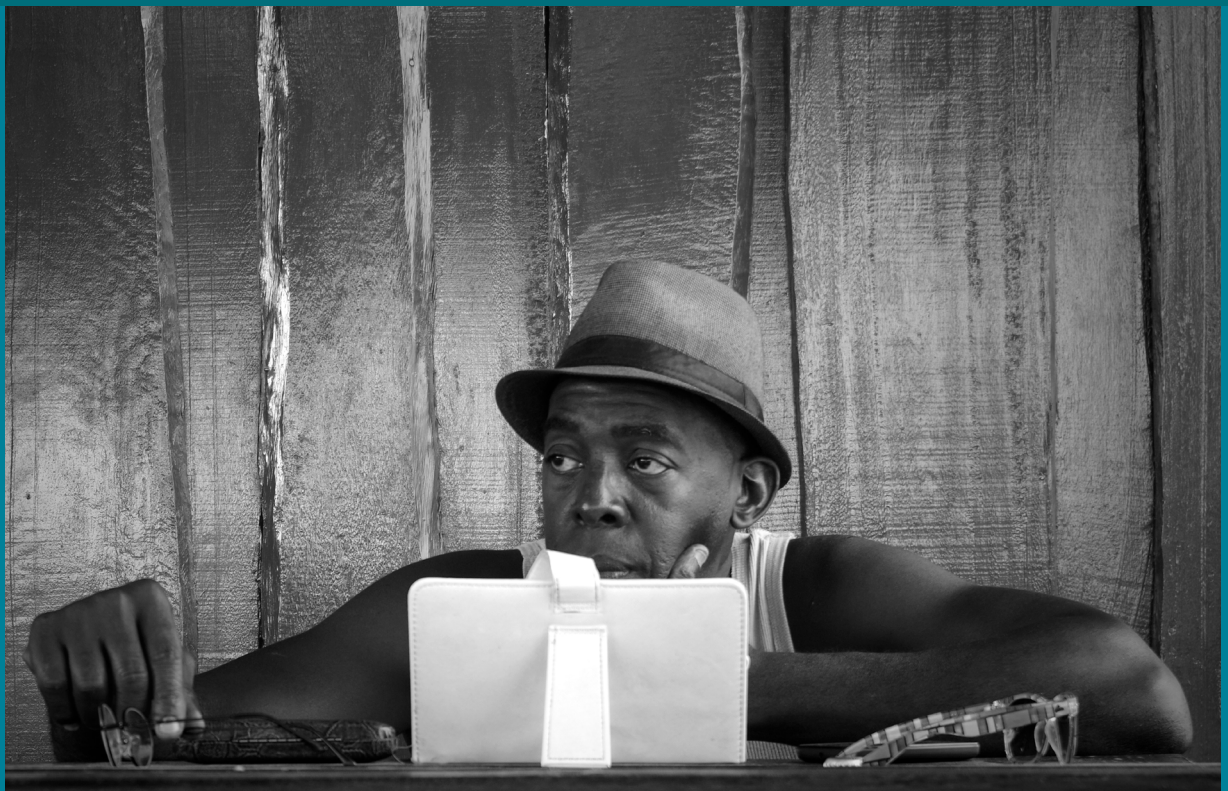

Video tablets as a telehealth solution for veterans with access barriers

The promise of the experience sampling method for psychiatric care

Improving criminal justice system evaluation of mental disorders with CAT

Inclusion of people with lived experience in the research process
